# Supplementary material for: Platinum nanoparticle-anchored metal–organic complex nanospheres by a coordination–crystallization approach for enhanced sonodynamic therapy of tumors
Source: Royal Society of Chemistry journal article supplement (doi:10.1039/d3tb02497k), 2023-01-01
Supplement: d3tb02497k1.pdf [file d3tb02497k1.pdf]

## Electronic Supplementary Information (ESI)

### **Platinum nanoparticles anchored metal-organic complex nanospheres by a coordination-crystallization approach for enhanced sonodynamic therapy of tumor**

*Tangyao Sun<sup>a</sup>, Rui Wang<sup>a</sup>, Wei Lu<sup>a</sup>, Xuzhi Shi<sup>a</sup>, Feng Gao<sup>b</sup>, Tingting Wu<sup>a</sup>, Guoqin Wang<sup>a</sup>, Xiaodan Su<sup>a,\*</sup>, Zhaogang Teng<sup>a,\*</sup>*

<sup>a</sup> Key Laboratory for Organic Electronics and Information Displays and Jiangsu Key Laboratory for Biosensors, Institute of Advanced Materials, Jiangsu National Synergetic Innovation Centre for Advanced Materials, Nanjing University of Posts and Telecommunications, Nanjing 210023, P.R. China. Email: iamzgteng@njupt.edu.cn

<sup>b</sup> Key Laboratory for Experimental Teratology of the Ministry of Education and Research Center for Experimental Nuclear Medicine, School of Basic Medical Sciences, Cheeloo College of Medicine, Shandong University, Shandong 250012, P.R. China. Email: rggaofeng@sdu.edu.cn

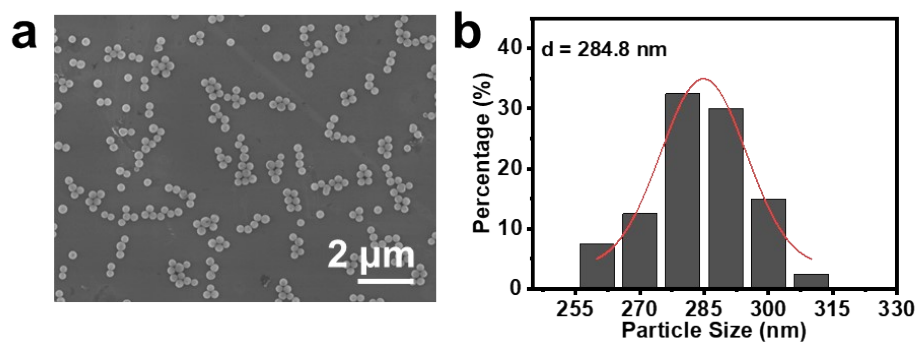

**Fig. S1** SEM image and histogram displaying the size distribution of the Pt-MOCs. (a) Low magnification SEM image of the Pt-MOCs. (b) A histogram displaying the particle size distribution of the Pt-MOCs.

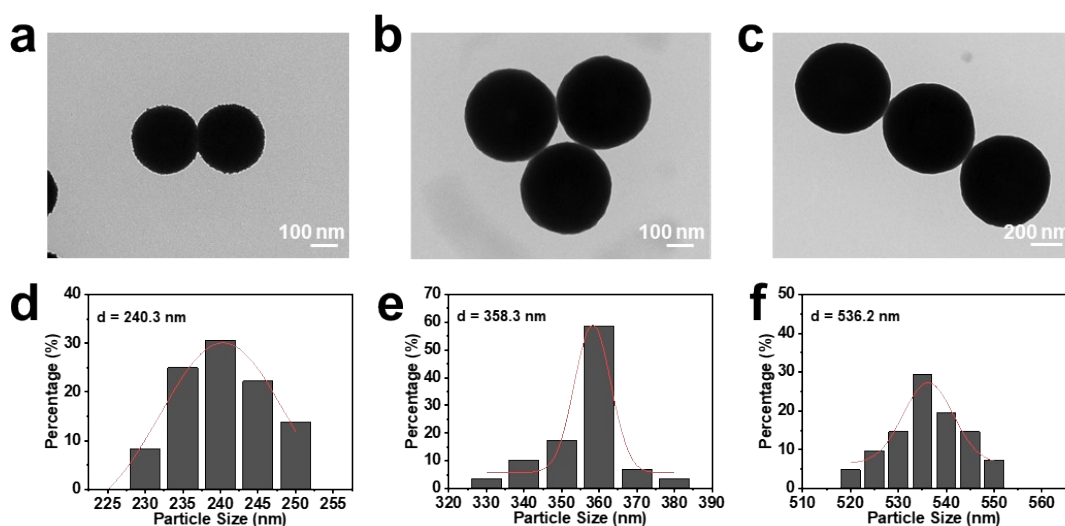

**Fig. S2** TEM images and histograms showing particle size distribution of Pt-MOCs prepared at DSF dosage of (a, d) 0.25mM, (b, e) 1.0 mM, (c, f) 1.5mM.

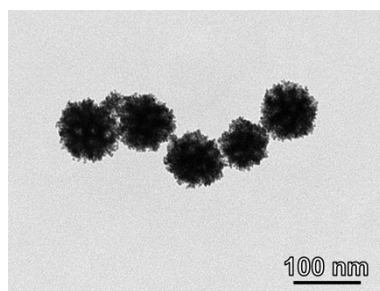

**Fig. S3** TEM image of Pt nanoparticles used as control materials for evaluating the sonodynamic performance.

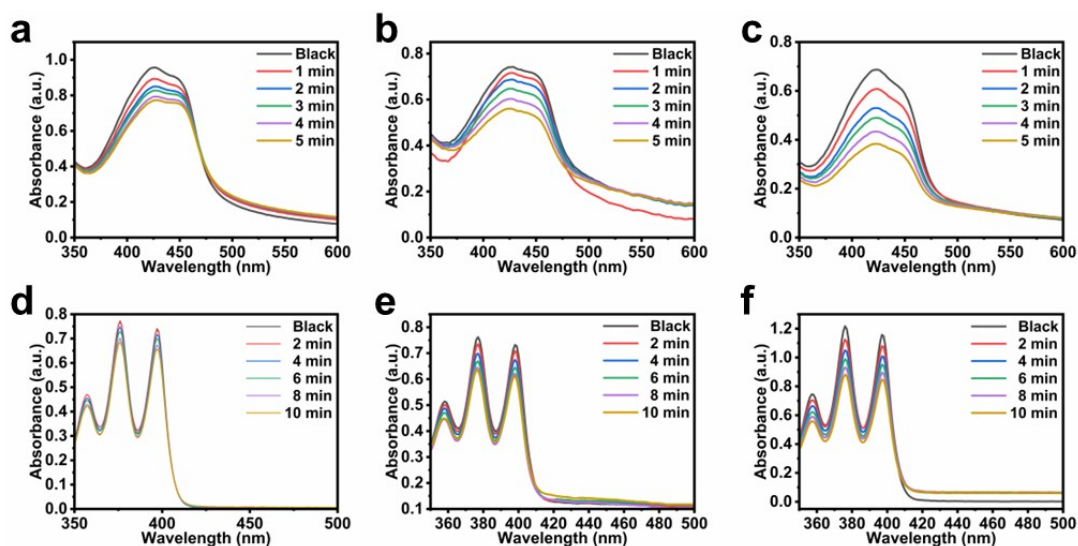

**Fig. S4** UV-vis spectra of DPBF in the (a) US, (b) Pt+US, and (c) MOCs+US groups under a US irradiation (1 MHz, 1.0 W cm<sup>-2</sup>). UV-vis spectra of ABDA in the (d) US, (e) Pt+US, and (f) MOCs+US groups under a US irradiation (1 MHz, 1.0 W cm<sup>-2</sup>).

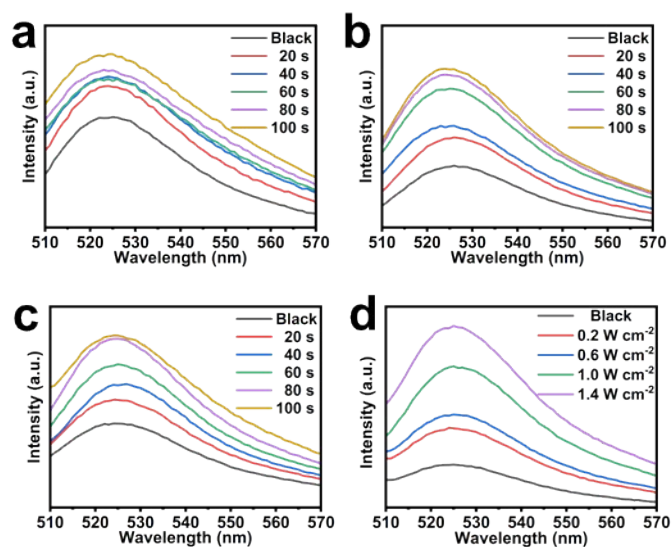

**Fig. S5** The fluorescence spectra of SOSG in the (a) US, (b) Pt+US and (c) MOCs+US groups after exposing to an US irradiation (1 MHz, 1 W cm<sup>-2</sup>) for different times. (d) The fluorescence intensity of SOSG in the presence of Pt-MOCs at the concentration of 75 μg mL<sup>-1</sup> upon 1 min US irradiation at varied power densities.

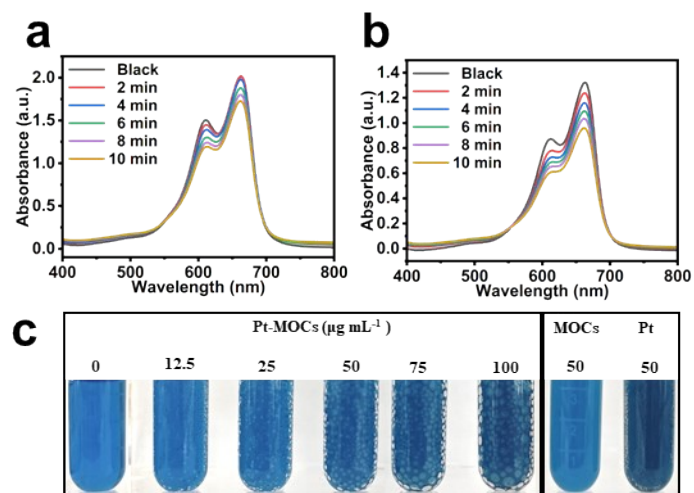

**Fig. S6** UV-vis spectra of aqueous MB solution mixed with (a) PBS and (b) Pt-MOCs, and exposed to an US irradiation (1 MHz, 1.0 W cm<sup>-2</sup>). (c) Photographs of H<sub>2</sub>O<sub>2</sub> solutions in the presence of Pt-MOCs with different concentrations, MOCs at 50  $\mu\text{g mL}^{-1}$ , and Pt nanoparticles at 50  $\mu\text{g mL}^{-1}$ .

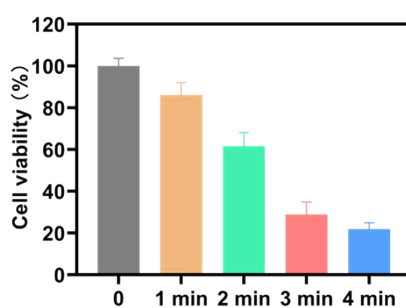

**Fig. S7** Cell viability of 4T1 cells incubated with Pt-MOCs for different times.
